# Supplementary material for: Literature-aided meta-analysis of microarray data: a compendium study on muscle development and disease
Source: Springer Nature journal article supplement (doi:10.1186/1471-2105-9-291), 2008-06-24
Supplement: 12859_2008_2276_MOESM1_ESM.pdf [file 12859_2008_2276_MOESM1_ESM.pdf]

| Dataset | PubmedID | First author   | Year | Species | Platform                | Chip ID             | Tissue / Cell line   | Specification of tissue        | Gene deficiency / condition              | Treatment                  | Control / Reference                             | Cut-off used by authors                                              | # Genes Up | # Genes Down     | Export group     |
|---------|----------|----------------|------|---------|-------------------------|---------------------|----------------------|--------------------------------|------------------------------------------|----------------------------|-------------------------------------------------|----------------------------------------------------------------------|------------|------------------|------------------|
| 1       | 11823445 | Porter         | 2002 | mouse   | Afymetrix               | U74A                | skeletal muscle      | gastrocnemius, quadriceps      | dystrophin                               | no                         | wild-type age 8 wk                              | consistent diff. Wilcoxon's rank test, SAM, fold change values >=1.5 | 184        | 8                | dystrophinopathy |
| 2       | 15683191 | Sparkes        | 2005 | human   | Spotted oligonucleotide | Home_Sparks         | skeletal muscle      | vastus lateralis               | insulin-sensitive                        | high fat diet              | insulin-sensitive males before high-fat diet    | t-test p < 0.01 (Bonferroni-adjusted)                                | 94         | 110              |                  |
| 4a      | 12832294 | Khanna         | 2003 | rat     | Afymetrix               | U34A                | skeletal muscle      | extraocular                    | no                                       | no                         | several muscles                                 | fold change >=2                                                      | 13         | 0                | extraocular      |
| 4b      | 12832294 | Khanna         | 2003 | rat     | Afymetrix               | U34A                | skeletal muscle      | extraocular                    | no                                       | no                         | leg                                             | consistent difference call, fold change >=2                          | 93         | 54               | extraocular      |
| 5a      | 15138310 | Cheng          | 2004 | rat     | Afymetrix               | U34A                | skeletal muscle      | extraocular                    | no                                       | age 7d                     | timepoint 0 days (birth)                        | fold change >2                                                       | 17         | 9                |                  |
| 5b      | 15138310 | Cheng          | 2004 | rat     | Afymetrix               | U34A                | skeletal muscle      | extraocular                    | no                                       | age 14d                    | timepoint 0 days (birth)                        | fold change >2                                                       | 113        | 64               |                  |
| 5c      | 15138310 | Cheng          | 2004 | rat     | Afymetrix               | U34A                | skeletal muscle      | extraocular                    | no                                       | age 21d                    | timepoint 0 days (birth)                        | fold change >2                                                       | 162        | 105              |                  |
| 5d      | 15138310 | Cheng          | 2004 | rat     | Afymetrix               | U34A                | skeletal muscle      | extraocular                    | no                                       | age 28d                    | timepoint 0 days (birth)                        | fold change >2                                                       | 144        | 142              |                  |
| 5e      | 15138310 | Cheng          | 2004 | rat     | Afymetrix               | U34A                | skeletal muscle      | extraocular                    | no                                       | age 45d                    | timepoint 0 days (birth)                        | fold change >2                                                       | 132        | 219              |                  |
| 7a      | 12874102 | Porter         | 2003 | mouse   | Afymetrix               | U74A                | skeletal muscle      | hindlimb                       | dystrophin                               | no                         | wild-type age 7d                                | consistent diff. from Wilcoxon's rank test, fold change values >=1.5 | 3          | 21               |                  |
| 7b      | 12874102 | Porter         | 2003 | mouse   | Afymetrix               | U74A                | skeletal muscle      | hindlimb                       | dystrophin                               | no                         | wild-type age 14d                               | consistent diff. from Wilcoxon's rank test, fold change values >=1.5 | 13         | 2                |                  |
| 7c      | 12874102 | Porter         | 2003 | mouse   | Afymetrix               | U74A                | skeletal muscle      | hindlimb                       | dystrophin                               | no                         | wild-type age 23d                               | consistent diff. from Wilcoxon's rank test, fold change values >=1.5 | 196        | 51               | dystrophinopathy |
| 7d      | 12874102 | Porter         | 2003 | mouse   | Afymetrix               | U74A                | skeletal muscle      | hindlimb                       | dystrophin                               | no                         | wild-type age 28d                               | consistent diff. from Wilcoxon's rank test, fold change values >=1.5 | 108        | 21               | dystrophinopathy |
| 7e      | 12874102 | Porter         | 2003 | mouse   | Afymetrix               | U74A                | skeletal muscle      | hindlimb                       | dystrophin                               | no                         | wild-type age 56d                               | consistent diff. from Wilcoxon's rank test, fold change values >=1.5 | 362        | 65               | dystrophinopathy |
| 7f      | 12874102 | Porter         | 2003 | mouse   | Afymetrix               | U74A                | skeletal muscle      | hindlimb                       | dystrophin                               | no                         | wild-type age 112d                              | consistent diff. from Wilcoxon's rank test, fold change values >=1.5 | 99         | 73               | dystrophinopathy |
| 7g      | 12874102 | Porter         | 2003 | mouse   | Afymetrix               | U74A                | skeletal muscle      | extraocular                    | dystrophin                               | no                         | wild-type age 14d                               | consistent diff. from Wilcoxon's rank test, fold change values >=1.5 | 3          | 2                |                  |
| 7h      | 12874102 | Porter         | 2003 | mouse   | Afymetrix               | U74A                | skeletal muscle      | extraocular                    | dystrophin                               | no                         | wild-type age 28d                               | consistent diff. from Wilcoxon's rank test, fold change values >=1.5 | 7          | 3                |                  |
| 7i      | 12874102 | Porter         | 2003 | mouse   | Afymetrix               | U74A                | skeletal muscle      | extraocular                    | dystrophin                               | no                         | wild-type age 56d                               | consistent diff. from Wilcoxon's rank test, fold change values >=1.5 | 5          | 16               |                  |
| 7j      | 12874102 | Porter         | 2003 | mouse   | Afymetrix               | U74A                | skeletal muscle      | extraocular                    | dystrophin                               | no                         | wild-type age 112d                              | consistent diff. from Wilcoxon's rank test, fold change values >=1.5 | 16         | 3                |                  |
| 8       | 14508282 | Lennox         | 2003 | mouse   | Afymetrix               | U74A                | skeletal muscle      | gastrocnemius, quadriceps      | dysferlin                                | no                         | wild-type age 6 wk and 8 months                 | Correlation networks                                                 | 74         | 107              | dysferlinopathy  |
| 9a      | 15687108 | Teran-Garcia   | 2005 | human   | Spotted oligonucleotide | Home_Pennington     | skeletal muscle      | unknown                        | no insulin sensi. change (bef. training) | exercise                   | insulin sensitivity improvement (bef. training) | fold change >1.4                                                     | 21         | 4                |                  |
| 9b      | 15687108 | Teran-Garcia   | 2005 | human   | Spotted oligonucleotide | Home_Pennington     | skeletal muscle      | unknown                        | no insulin sensi. change (posttraining)  | exercise                   | insulin sensitivity improvement (posttraining)  | fold change >1.4                                                     | 29         | 28               |                  |
| 10      | 14688207 | Tomczak        | 2004 | mouse   | Afymetrix               | U74A+C              | myoblast             | unknown                        | C2C12                                    | no                         | undifferentiated                                | CAGED clustering, fold-change >2.0 relative to time -2 days          | 448        | 352              | regen. and diff. |
| 11a     | 11121445 | Chen           | 2000 | human   | Afymetrix               | HuGeneFL            | skeletal muscle      | unknown                        | dystrophin                               | no                         | healthy                                         | Rosetta error model p < 0.01 (Benjamini-Hochberg corrected)          | 341        | 161              | dystrophinopathy |
| 11b     | 11121445 | Chen           | 2000 | human   | Afymetrix               | HuGeneFL            | skeletal muscle      | unknown                        | dystrophin                               | no                         | healthy                                         | fold-change >=2                                                      | 41         | 39               | dystrophinopathy |
| 12      | 14519293 | Arvanitakis    | 2003 | human   | Afymetrix               | HuGeneFL + U95A     | skeletal muscle      | biceps                         | FDHD                                     | no                         | healthy                                         | fold-change >=2 on U95A2 and HuFL                                    | 13         | 65               |                  |
| 13      | 12677001 | Sanoudou       | 2003 | human   | Afymetrix               | U95A+B              | skeletal muscle      | unknown                        | nemaline myopathy                        | no                         | healthy                                         | t-test p < 0.001                                                     | 58         | 115              | myopathy         |
| 14a     | 11572940 | Porter         | 2001 | mouse   | Afymetrix               | U74A                | skeletal muscle      | extraocular                    | no                                       | no                         | gastrocnemius and soleus muscle                 | SAM FDR <=0.4                                                        | 24         | 22               | extraocular      |
| 14b     | 11572940 | Porter         | 2001 | mouse   | Afymetrix               | U74A                | skeletal muscle      | extraocular                    | no                                       | no                         | jaw                                             | SAM FDR <=0.4                                                        | 30         | 36               | extraocular      |
| 15      | 12415109 | Haslett        | 2002 | human   | Afymetrix               | U95A                | skeletal muscle      | quadriceps                     | dystrophin                               | no                         | healthy                                         | t-test p < 0.0001; FDR = 0.0023                                      | 70         | 14               | dystrophinopathy |
| 16      | 12471055 | Campanaro      | 2002 | human   | Spotted cDNA            | Home_muscle_Bologna | skeletal muscle      | unknown                        | dysferlin                                | no                         | healthy                                         | fold-change >=1.8                                                    | 43         | 13               | dysferlinopathy  |
| 17      | 14519198 | Samson         | 2003 | human   | Afymetrix               | U74A                | skeletal muscle      | vastus lateralis               | no                                       | leg exercise               | paired t-test p < 0.05 at 6 and 18h             | 10                                                                   | 10         | regen. and diff. |                  |
| 18      | 15326121 | Khanna         | 2004 | monkey  | Afymetrix               | U133A               | skeletal muscle      | Orbital layer of ocular muscle | no                                       | no                         | global layer of ocular muscle                   | t-test p < 0.05 (RMA and MAS), fold-change >=2                       | 71         | 62               |                  |
| 19      | 12176734 | Rouger         | 2002 | mouse   | Spotted cDNA            | Home_INSERTM_DD     | skeletal muscle      | hindlimb                       | dystrophin                               | no                         | healthy                                         | fold change >2 at different time points                              | 23         | 11               | dystrophinopathy |
| 21      | 12477723 | Yan            | 2003 | mouse   | Spotted cDNA            | Home_NIH_Caltech    | skeletal muscle      | tibialis anterior              | Cardiotoxin                              | no                         | untreated                                       | fold change >2.5                                                     | 1176       | 1004             | regen. and diff. |
| 22      | 15126512 | Viguerie       | 2004 | human   | Spotted cDNA            | Home_Viguerie       | skeletal muscle      | vastus lateralis               | epinephrine                              | no                         | healthy                                         | SAM FDR < 0.001                                                      | 1107       | 402              |                  |
| 23      | 15589861 | Richardson     | 2005 | human   | Afymetrix               | U133A               | skeletal muscle      | vastus lateralis               | lipid infusion                           | no                         | saline                                          | SAM and Genespring                                                   | 26         | 0                |                  |
| 24a     | 12391344 | Greenberg      | 2002 | human   | Afymetrix               | U95A                | skeletal muscle      | unknown                        | no                                       | no                         | healthy                                         | fold-change >=10 minexpr=500                                         | 45         | 0                | myositis         |
| 24b     | 12391344 | Greenberg      | 2002 | human   | Afymetrix               | U95A                | skeletal muscle      | unknown                        | polymyositis                             | no                         | healthy                                         | fold-change >=10 minexpr=500                                         | 121        | 0                | myositis         |
| 24c     | 12391344 | Greenberg      | 2002 | human   | Afymetrix               | U95A                | skeletal muscle      | unknown                        | dermatomyositis                          | no                         | healthy                                         | fold-change >=10 minexpr=500                                         | 45         | 0                | myositis         |
| 25      | 12937035 | Chen           | 2003 | human   | Afymetrix               | U95A                | skeletal muscle      | vastus lateralis               | no                                       | ec-&concentric contraction | concentric contractions only                    | t-test p < 0.05, fold-change >5                                      | 24         | 0                |                  |
| 28a     | 14715702 | Nikawa         | 2004 | rat     | Afymetrix               | U34A+B+C            | skeletal muscle      | gastrocnemius                  | no                                       | space flight               | untreated                                       | fold change >=8                                                      | 59         | 101              | atrophy          |
| 28b     | 14715702 | Nikawa         | 2004 | rat     | Afymetrix               | U34A+B+C            | skeletal muscle      | gastrocnemius                  | no                                       | tail suspension            | untreated                                       | fold change >=8                                                      | 22         | 18               | atrophy          |
| 30a     | 14618091 | Komamura       | 2003 | rat     | Afymetrix               | U34A                | skeletal muscle      | gastrocnemius                  | no                                       | no                         | untreated                                       | fold change >=3                                                      | 6          | 9                | atrophy          |
| 30b     | 14618091 | Komamura       | 2003 | rat     | Afymetrix               | U34A                | skeletal muscle      | gastrocnemius                  | no                                       | no                         | untreated                                       | fold change >=3                                                      | 6          | 1                |                  |
| 32      | 12133862 | Tsang          | 2002 | mouse   | Afymetrix               | U74A                | skeletal muscle      | gastrocnemius                  | dystrophin                               | no                         | wild-type age 16 wk                             | t-test p < 0.01 (Benjamini-Hochberg corrected); fold-change >=2      | 97         | 16               | dystrophinopathy |
| 33a     | 15475267 | Kuninger       | 2004 | mouse   | Afymetrix               | U74A+B+C            | myoblast             | C2AS12                         | no                                       | IGF                        | untreated                                       | fold change >=3                                                      | 67         | 0                |                  |
| 33b     | 15475267 | Kuninger       | 2004 | mouse   | Afymetrix               | U74A+B+C            | myoblast             | C2AS12                         | no                                       | untreated                  | fold change >=3                                 | 43                                                                   | 0          |                  |                  |
| 34      | 15056467 | Sanoudou       | 2004 | human   | Afymetrix               | U95A+B              | skeletal muscle      | unknown                        | nemaline myopathy non-typing             | PDGF                       | no                                              | correlation method                                                   | 182        | 76               |                  |
| 35      | 15755682 | Corbell-Girard | 2005 | human   | Afymetrix               | U133A               | lung carcinoma cells | AL5491TA                       | Ala expansion in overexpr. Pabp1         | no                         | mock-infected                                   | fold change >=2.5; Intensity difference > 200 units                  | 88         | 87               |                  |
| 38a     | 15036332 | Blanco         | 2004 | mouse   | Spotted oligonucleotide | Home_Compugen_Brown | skeletal muscle      | soleus (affected)              | unknown - ky                             | no                         | wild-type                                       | Bayes probability; additional cut-off for signal units.              | 19         | 54               |                  |
| 38b     | 15036332 | Blanco         | 2004 | mouse   | Spotted oligonucleotide | Home_Compugen_Brown | skeletal muscle      | EDL (unaffected)               | unknown - ky                             | no                         | wild-type                                       | Bayes probability; additional cut-off for signal units.              | 15         | 15               |                  |
| 39a     | 15811552 | Suzuki         | 2005 | mouse   | Codelink                | Uniset mouse I      | skeletal muscle      | quadriceps                     | dysferlin                                | no                         | wild-type                                       | t-test p < 0.05, fold change >=2                                     | 115        | 59               | dysferlinopathy  |
| 39b     | 15811552 | Suzuki         | 2005 | mouse   | Codelink                | Uniset mouse I      | skeletal muscle      | quadriceps                     | dysferlin                                | no                         | wild-type                                       | t-test p < 0.05, fold change >=2                                     | 119        | 79               | dysferlinopathy  |
| 40      | 15272020 | Kamei          | 2004 | mouse   | Afymetrix               | U74A                | skeletal muscle      | quadriceps                     | no                                       | no                         | wild-type                                       | Fisher's protected least significant difference test                 | 0          | 18               |                  |
| 41      | 15728662 | Crimi          | 2005 | human   | Afymetrix               | U133A               | skeletal muscle      | unknown                        | mitochondrial encephalo-myopathy         | no                         | unknown                                         | fold change >=2.5                                                    | 43         | 59               | myopathy         |
| 42a     | 14681298 | Porter         | 2004 | mouse   | Afymetrix               | U74A                | skeletal muscle      | diaphragm                      | dystrophin                               | no                         | wildtype - age 7d                               | pairwise replicate comparisons Wilcoxon p < 0.01                     | 1          | 33               |                  |
| 42b     | 14681298 | Porter         | 2004 | mouse   | Afymetrix               | U74A                | skeletal muscle      | diaphragm                      | dystrophin                               | no                         | wildtype - age 14d                              | pairwise replicate comparisons Wilcoxon p < 0.01                     | 9          | 4                |                  |
| 42c     | 14681298 | Porter         | 2004 | mouse   | Afymetrix               | U74A                | skeletal muscle      | diaphragm                      | dystrophin                               | no                         | wildtype - age 23d                              | pairwise replicate comparisons Wilcoxon p < 0.01                     | 192        | 26               | dystrophinopathy |
| 42d     | 14681298 | Porter         | 2004 | mouse   | Afymetrix               | U74A                | skeletal muscle      | diaphragm                      | dystrophin                               | no                         | wildtype - age 28d                              | pairwise replicate comparisons Wilcoxon p < 0.01                     | 186        | 43               | dystrophinopathy |
| 42e     | 14681298 | Porter         | 2004 | mouse   | Afymetrix               | U74A                | skeletal muscle      | diaphragm                      | dystrophin                               | no                         | wild-type - age 56d                             | pairwise replicate comparisons Wilcoxon p < 0.01                     | 234        | 213              | dystrophinopathy |
| 42f     | 14681298 | Porter         | 2004 | mouse   | Afymetrix               | U74A                | skeletal muscle      | diaphragm                      | dystrophin                               | no                         | wild-type - age 112 d                           | pairwise replicate comparisons Wilcoxon p < 0.01                     | 144        | 51               | dystrophinopathy |
| 42g     | 14681298 | Porter         | 2004 | mouse   | Afymetrix               | U74A                | skeletal muscle      | diaphragm                      | no                                       | no                         | no                                              | pairwise replicate comparisons Wilcoxon p < 0.01                     | 28         | 11               |                  |
| 43      | 14625377 | Sanoudou       | 2004 | human   | Afymetrix               | U95A                | skeletal muscle      | quadriceps, others             | no                                       | autopsy                    | surgical                                        | SAM FDR 0.0166, fold-change >2                                       | 119        | 0                |                  |
| 45a     | 15962335 | Kang           | 2005 | human   | Afymetrix               | U133A               | skeletal muscle      | deltoid                        | no                                       | no                         | quadriceps                                      | PCA                                                                  | 65         | 0                |                  |
| 45b     | 15962335 | Kang           | 2005 | human   | Afymetrix               | U133A               | skeletal muscle      | deltoid                        | no                                       | no                         | gastrocnemius                                   | PCA                                                                  | 65         | 0                |                  |
| 45c     | 15962335 | Kang           | 2005 | human   | Afymetrix               | U133A               | skeletal muscle      | deltoid                        | no                                       | no                         | tibialis anterior                               | PCA                                                                  | 4          | 0                |                  |
| 45d     | 15962335 | Kang           | 2005 | human   | Afymetrix               | U133A               | skeletal muscle      | gastrocnemius                  | no                                       | no                         | quadriceps                                      | PCA                                                                  | 18         | 0                |                  |
| 45e     | 15962335 | Kang           | 2005 | human   | Afymetrix               | U133A               | skeletal muscle      | gastrocnemius                  | no                                       | no                         | tibialis anterior                               | PCA                                                                  | 6          | 0                |                  |
| 45f     | 15962335 | Kang           | 2005 | human   | Afymetrix               | U133A               | skeletal muscle      | quadriceps                     | no                                       | no                         | tibialis anterior                               | PCA                                                                  | 37         | 0                |                  |
| 46      | 12637262 | Delgado        | 2003 | mouse   | Afymetrix               | U74A                | myoblast             | C2C12                          | no                                       | differentiation            | undifferentiated                                | K-means clustering; fold change >3.5                                 | 102        | 0                | regen. and diff. |
| 47      | 12208906 | Boer           | 2002 | mouse   | Afymetrix               | U74A                | skeletal muscle      | hindlimb                       | dystrophin and dystrophin x utrophin     | no                         | wild-type                                       | t-test p < 0.01                                                      | 79         | 60               | dystrophinopathy |
| 48a     | 15336692 | Sterrenburg    | 2004 | human   | Spotted cDNA            | LGTC_muscle         | myoblast             | primary                        | no                                       | differentiation            | undifferentiated                                | Z > 1.96                                                             | 68         | 63               | regen. and diff. |
| 48b     | 15336692 | Sterrenburg    | 2004 | human   | Spotted oligonucleotide | LGTC_Hu19K          | myoblast             | primary                        | no                                       | differentiation            | undifferentiated                                | ANOVA p < 0.000005; Fold-change >2                                   | 59         | 59               | regen. and diff. |
| 49      | 16679024 | Sterrenburg    | 2005 | human   | Spotted cDNA            | LGTC_muscle         | myoblast             | primary                        | no                                       | differentiation            | undifferentiated, healthy                       | ANOVA p < 0.000005                                                   | 39         | 46               |                  |
| 50      | 16011810 | Turk           | 2005 | mouse   | Spotted oligonucleotide | LGTC_Mu7.5K         | skeletal muscle      | quadriceps                     | dystrophin                               | no                         | healthy                                         | p < 1e-6 at least one time point                                     | 717        | 812              | dystrophinopathy |
| 51      | 163      |                |      |         |                         |                     |                      |                                |                                          |                            |                                                 |                                                                      |            |                  |                  |
