# Supplementary material for: Literature-aided meta-analysis of microarray data: a compendium study on muscle development and disease
Source: BMC Bioinformatics. 2008 Jun 24;9:291. doi: 10.1186/1471-2105-9-291 (PMC2459190; doi:10.1186/1471-2105-9-291)

## Appendix: Clustering and classification based on GO-overrepresentation analysis.

Table 1: Median classification scores (AUC) for the kappa and GO overrepresentation measure ( $p < 0.05$ )

| Group            | kappa | GO   |
|------------------|-------|------|
| Dysferlinopathy  | 0.61  | 0.6  |
| Dystrophinopathy | 0.85  | 0.75 |
| Regeneration     | 0.53  | 0.5  |
| Myositis         | 0.89  | 0.85 |
| Ageing           | 0.86  | 0.96 |
| Atrophy          | 0.71  | 0.44 |
| Extraocular      | 0.97  | 0.51 |

Figure 1: Clustering based on GO overrepresentation analysis ( $p < 0.05$ ).

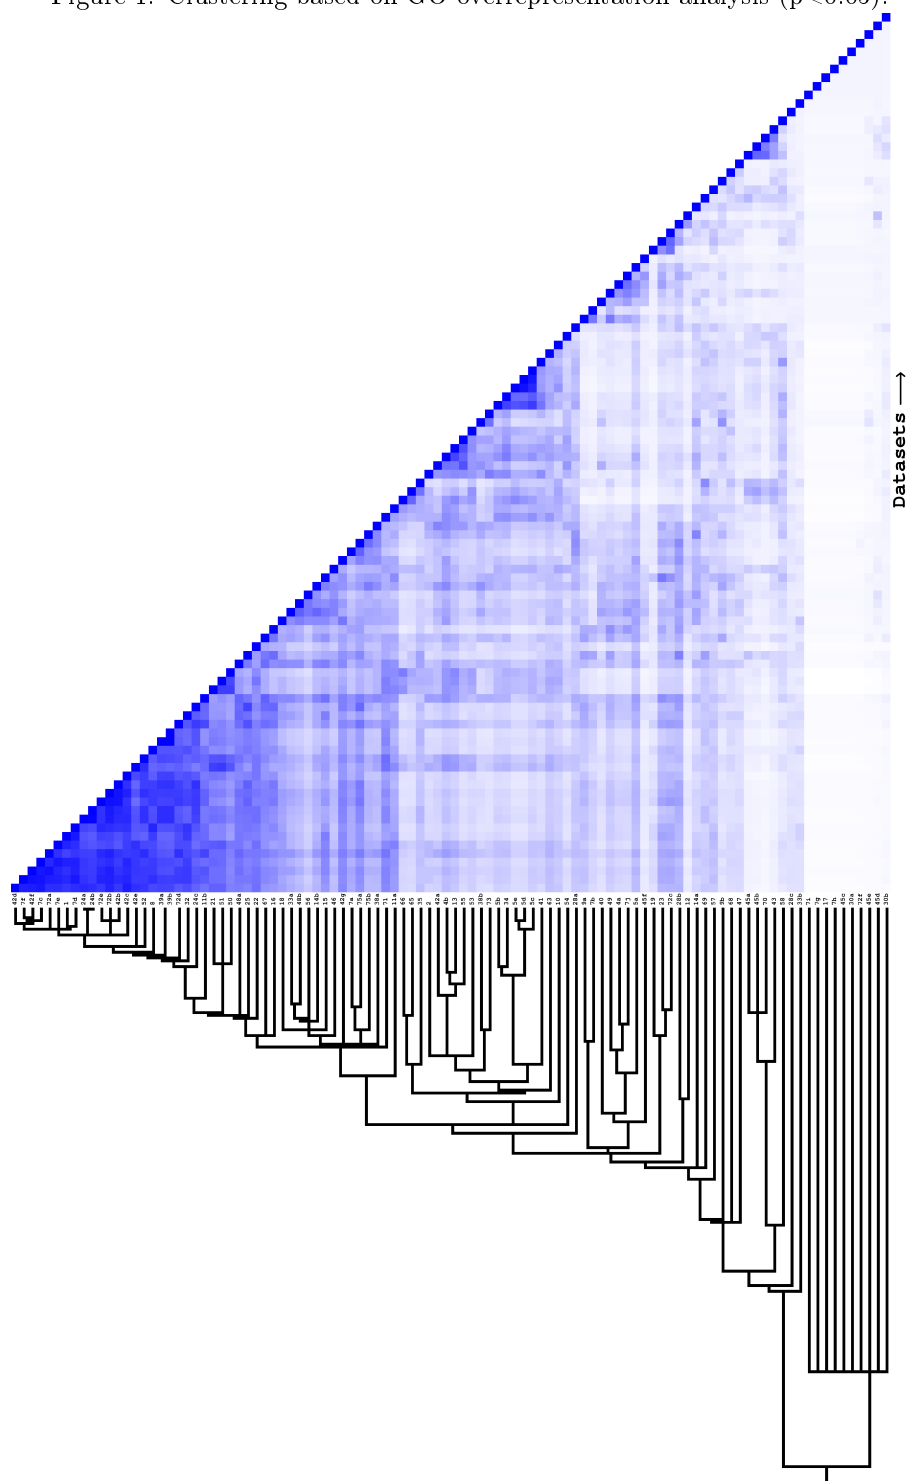

Supplement: Additional file 3 — Clustering and classification based on GO-overrepresentation analysis. The file provides the classification results for the expert clustering as well as the hierarchically clustered heatmap of the studies according to a comparison of the identified overrepresented GO categories. [file 1471-2105-9-291-S3.pdf]
